# Supplementary material
Source: publisher figshare collection journal article supplement (https://gsapubs.figshare.com/ndownloader/files/23294351)
Supplement: Supplementary file 1 [file 23294351]

## Sheet: information
	GSA Data Repository 2012286 Additional Data
	The data within this spreadsheet was published in Polyak et al. 2012.
	The data were retrieved from subsamples of stalagmite FS-2, Fort Stanton Cave, New Mexico USA
	The data were also retrieved from shelfstone samples, Carlsbad Cavern, New Mexico USA
	References for this data:
	Polyak, V.J., Asmerom, A., Burns, S.J., and Lachniet, M.S., 2012, Climatic backdrop to the terminal Pleistocene extinction of North American mammals. Geology 40:1023-1026.
	also see:
	Asmerom, Y., Polyak, V., and Burns, S.J., 2010, Variable winter moisture in the southwestern United States linked to rapid glacial climate shifts. Nature Geoscience 3:114-117.

## Sheet: d234U time-series
	This time-series ties all distances to the same age formulas reported for the stable isotopes in Polyak et al. 2012
	Z = depth below stalagmite FS-2 top in mm
	δ234Uinitial times-series for stalagmite FS-2										All δ234Uinitial values from Polyak et al. 2012 and Asmerom et al. 2012
		calculated
	Z (mm)	age	δ234Uinitial	2-σ abs error							sub-sample	Z (mm)	δ234Uinitial	2-σ abs error		note
	0.5	11756.4	673.021	1.56							FS-1	0.8	650.829	2.4632		from Asmerom et al. 2010 U-series data
	0.8	12003	650.829	2.4632							FS-10	1.4	640.182	3.72396		from Asmerom et al. 2010 U-series data
	1.4	12439.7	640.182	3.72396							FS-11	2.3	572.895	2.6273		from Asmerom et al. 2010 U-series data
	1.5	12505.7	638.581	3.78							FS-12	3.3	568.176	1.25048		from Asmerom et al. 2010 U-series data
	2.3	12969.7	572.895	2.6273							FS-13	4.2	539.975	1.41117		from Asmerom et al. 2010 U-series data
	2.5	13069.3	561.656	2.78							FS-14	5	548.133	2.03485		from Asmerom et al. 2010 U-series data
	3	13292.8	552.944	1.78							FS-15	6.9	519.182	3.14343		from Asmerom et al. 2010 U-series data
	3.3	13410.6	568.176	1.25048							FS-16	8	522.323	4.48577		from Asmerom et al. 2010 U-series data
	3.5	13482.9	544.952	2.42							FS-17	8.8	542.146	2.04524		from Asmerom et al. 2010 U-series data
	4.2	13700.4	539.975	1.41117							FS-18	10.3	514.467	1.96422		from Asmerom et al. 2010 U-series data
	4.5	13778.4	531.345	6.96							FS-19	10.6	517.401	0.91663		from Asmerom et al. 2010 U-series data
	4.75	13837.1	541.921	2.27							FS-2	12.4	523.884	1.04092		from Asmerom et al. 2010 U-series data
	5	13890.8	548.133	2.03485							FS-20	14.6	550.233	1.56883		from Asmerom et al. 2010 U-series data
	6.9	14167.4	519.182	3.14343							FS-21	16.3	548.788	1.39213		from Asmerom et al. 2010 U-series data
	7	14177.2	515.05	2.27							FS-22	17.5	552.166	1.28002		from Asmerom et al. 2010 U-series data
	8	14259.5	522.323	4.48577							FS-23	18.5	553.653	0.912067		from Asmerom et al. 2010 U-series data
	8.8	14312.3	542.146	2.04524							FS-24	19.9	584.792	1.18555		from Asmerom et al. 2010 U-series data
	9.5	14355.4	509.921	3.5							FS-25	22.2	603.298	1.86305		from Asmerom et al. 2010 U-series data
	9.504	14355.7	522.035	1.73705							FS-26	22.7	567.303	0.798214		from Asmerom et al. 2010 U-series data
	10.3	14406.8	514.467	1.96422							FS-27	24.3	539.082	1.14771		from Asmerom et al. 2010 U-series data
	10.6	14427.7	517.401	0.91663							FS-28	26.3	539.286	1.08831		from Asmerom et al. 2010 U-series data
	10.924	14451.7	505.867	1.78756							FS-29	27.3	546.645	1.2303		from Asmerom et al. 2010 U-series data
	11	14457.6	508.188	1.77							FS-3	28.5	546.502	2.75892		from Asmerom et al. 2010 U-series data
	12.4	14587.3	523.884	1.04092							FS-30	30.5	531.805	1.20421		from Asmerom et al. 2010 U-series data
	12.5	14598.4	528.615	1.39							FS-31	32.3	518.889	1.29381		from Asmerom et al. 2010 U-series data
	12.574	14606.8	519.911	1.71485							FS-32	33.2	502.933	1.21481		from Asmerom et al. 2010 U-series data
	14	14799	521.22	2.2							FS-33	34.2	536.303	1.23329		from Asmerom et al. 2010 U-series data
	14.172	14826.4	531.814	1.77766							FS-34	35.5	538.978	0.830063		from Asmerom et al. 2010 U-series data
	14.6	14898.8	550.233	1.56883
	15.5	15070.7	535.433	2.36							FS2-0.5	0.5	673.021	1.56		from unspiked powder Polyak et al. 2012
	15.924	15161.1	532.419	1.78696							FS2-1.5	1.5	638.581	3.78		from unspiked powder Polyak et al. 2013
	16.3	15246.2	548.788	1.39213							FS2-2.5	2.5	561.656	2.78		from unspiked powder Polyak et al. 2014
	17	15417.2	550.135	2.35							FS2-3	3	552.944	1.78		from unspiked powder Polyak et al. 2015
	17.5	15549	552.166	1.28002							FS2-3.5	3.5	544.952	2.42		from unspiked powder Polyak et al. 2016
	18	15688.6	556.62	1.71							FS2-4.5	4.5	531.345	6.96		from unspiked powder Polyak et al. 2017
	18.5	15835.8	553.653	0.912067							FS2-5	4.75	541.921	2.27		from unspiked powder Polyak et al. 2018
	19	15990.3	557.291	1.88							FS2-7	7	515.05	2.27		from unspiked powder Polyak et al. 2019
	19.9	16285.7	584.792	1.18555							FS2-9.5	9.5	509.921	3.5		from unspiked powder Polyak et al. 2020
	20.2	16388.9	556.092	2.29358							FS2-11	11	508.188	1.77		from unspiked powder Polyak et al. 2021
	20.5	16494.2	595.462	1.82							FS2-12.5	12.5	528.615	1.39		from unspiked powder Polyak et al. 2022
	21.5	16860.4	587.92	1.38							FS2-14	14	521.22	2.2		from unspiked powder Polyak et al. 2023
	22.2	17129.3	603.298	1.86305							FS2-15.5	15.5	535.433	2.36		from unspiked powder Polyak et al. 2024
	22.7	17327.3	567.303	0.798214							FS2-17	17	550.135	2.35		from unspiked powder Polyak et al. 2025
	23	17540.6	569.812	1.65							FS2-18	18	556.62	1.71		from unspiked powder Polyak et al. 2026
	23.5	17870.7	556.551	1.7							FS2-19	19	557.291	1.88		from unspiked powder Polyak et al. 2027
	24	18061.9	543.843	2.42							FS2-20.5	20.5	595.462	1.82		from unspiked powder Polyak et al. 2028
	24.3	18153.2	539.082	1.14771							FS2-21.5	21.5	587.92	1.38		from unspiked powder Polyak et al. 2029
	24.5	18213.9	540.118	1.16395							FS2-23	23	569.812	1.65		from unspiked powder Polyak et al. 2030
	25	18386.7	530.167	1.95							FS2-23.5	23.5	556.551	1.7		from unspiked powder Polyak et al. 2031
	26.3	19079.1	539.286	1.08831							FS2-24	24	543.843	2.42		from unspiked powder Polyak et al. 2032
	26.5	19213.9	539.108	1.67							FS2-25	25	530.167	1.95		from unspiked powder Polyak et al. 2033
	27.3	19783.8	546.645	1.2303							FS2-26.5	26.5	539.108	1.67		from unspiked powder Polyak et al. 2034
	28.2	20395.9	544.222	3.97741
	28.5	20574.5	546.502	2.75892							FS2-9_3mm	9.504	522.035	1.73705		from new U-series data Polyak et al. 2012
	30.5	21336.8	531.805	1.20421							FS2-10_7mm	10.924	505.867	1.78756		from new U-series data Polyak et al. 2013
	32	21809	525.374	0.934041							FS2-12_4mm	12.574	519.911	1.71485		from new U-series data Polyak et al. 2014
	32.3	21968.9	518.889	1.29381							FS2-14_2mm	14.172	531.814	1.77766		from new U-series data Polyak et al. 2015
	33.2	22693.2	502.933	1.21481							FS2-16_0mm	15.924	532.419	1.78696		from new U-series data Polyak et al. 2016
	34.2	23988.2	536.303	1.23329							FS2-19_7mm	20.2	556.092	2.29358		from new U-series data Polyak et al. 2017
	35.5	26055.6	538.978	0.830063							FS2-24_2mm	24.5	540.118	1.16395		from new U-series data Polyak et al. 2018
	35.8	26438.3	558.225	2.7737							FS2-27_8mm	28.2	544.222	3.97741		from new U-series data Polyak et al. 2019
											FS2-31_8mm	32	525.374	0.934041		from new U-series data Polyak et al. 2020
											FS2-35_3mm	35.8	558.225	2.7737		from new U-series data Polyak et al. 2021

## Sheet: d13C-d18O time-series
		U-series-based
		Chronology					Z = depth below stalagmite top in mm
	Z (mm)	Yrs before 2010AD	δ13C	δ18O			stable isotope values in ‰ VPDB
	0.1	11396	-2.05455	-6.27577
	0.2	11489.7	-1.79396	-6.29517
	0.3	11581	-1.90808	-6.38827
	0.4	11669.9	-2.0603	-7.28858
	0.5	11756.6	-2.02131	-7.90728
	0.6	11841	-1.77127	-7.64763
	0.7	11923.2	-1.68436	-7.99733
	0.8	12003.3	-1.62912	-8.22384
	0.9	12081.2	-1.65133	-8.28536
	1	12157.1	-1.63239	-8.03418
	1.1	12230.9	-1.4025	-7.30581
	1.2	12302.7	-1.93659	-8.47244
	1.3	12372.5	-2.24421	-8.5304
	1.4	12440.4	-2.36016	-8.47654
	1.5	12506.3	-2.46008	-8.73848
	1.6	12570.5	-2.55406	-8.83362
	1.7	12632.7	-2.78558	-8.33269
	1.8	12693.2	-3.05809	-7.40272
	1.9	12752	-3.28472	-6.88989
	2	12809	-3.47758	-6.78027
	2.1	12864.4	-3.69569	-6.54945
	2.2	12918.1	-3.98075	-7.02252
	2.3	12970.1	-4.12143	-7.20493
	2.4	13020.6	-4.25847	-7.15203
	2.5	13069.6	-4.37942	-6.88865
	2.6	13117	-4.54094	-6.73738
	2.7	13163	-4.626	-6.40936
	2.8	13207.5	-4.72272	-6.64268
	2.9	13250.6	-4.62865	-6.48797
	3	13292.3	-4.62789	-6.54159
	3.1	13332.6	-4.68152	-6.39353
	3.2	13371.6	-4.68648	-6.34089
	3.3	13409.4	-4.72808	-6.39145
	3.4	13445.9	-4.83588	-6.42201
	3.5	13481.1	-5.12995	-6.5366
	3.6	13515.2	-5.29002	-6.89473
	3.7	13548.1	-5.3573	-6.7804
	3.8	13579.8	-5.35461	-6.51727
	3.9	13610.5	-5.57611	-6.43539
	4	13640	-5.54633	-6.28552
	4.1	13668.5	-5.61105	-6.24666
	4.2	13696	-5.63132	-6.20988
	4.3	13722.5	-5.61081	-6.16027
	4.4	13748	-5.71387	-6.48575
	4.5	13772.6	-5.71541	-6.22262
	4.6	13796.3	-5.87939	-6.83891
	4.7	13819.1	-5.91074	-6.72466
	4.8	13841	-5.9299	-6.62731
	4.9	13862.1	-5.94945	-6.67394
	5	13882.4	-6.05743	-6.66776
	5.1	13901.9	-6.12936	-6.69641
	5.2	13920.6	-6.21336	-6.71212
	5.3	13938.6	-6.2618	-6.71699
	5.4	13955.9	-6.27314	-6.69413
	5.5	13972.5	-6.33494	-6.67911
	5.6	13988.5	-6.39936	-6.39995
	5.7	14003.8	-6.49436	-6.3094
	5.8	14018.5	-6.51769	-6.43149
	5.9	14032.6	-6.52445	-6.38778
	6	14046.2	-6.51986	-6.21204
	6.1	14059.2	-6.4965	-6.18428
	6.2	14071.7	-6.1807	-5.9625
	6.3	14083.6	-6.44603	-6.05232
	6.4	14095.1	-6.49822	-6.22697
	6.5	14106.2	-6.55449	-6.21892
	6.6	14116.8	-6.56748	-5.96072
	6.7	14127	-6.66943	-6.13229
	6.8	14136.7	-6.70305	-5.79561
	6.9	14146.2	-6.3287	-5.76749
	7	14155.2	-6.69127	-6.20473
	7.1	14163.9	-6.68194	-6.23057
	7.2	14172.3	-6.64149	-5.95957
	7.3	14180.4	-6.58075	-5.88125
	7.4	14188.2	-6.51901	-5.86351
	7.5	14195.8	-6.57713	-5.95673
	7.6	14203.1	-6.54798	-6.03722
	7.7	14210.1	-6.62097	-6.25254
	7.8	14217	-6.62992	-6.30018
	7.9	14223.7	-6.65156	-6.28525
	8	14230.1	-6.75289	-6.1639
	8.1	14236.5	-6.864	-6.12792
	8.2	14242.7	-6.93764	-6.16848
	8.3	14248.7	-6.99411	-6.21702
	8.4	14254.7	-6.87215	-6.32352
	8.5	14260.5	-6.87074	-6.39601
	8.6	14266.3	-6.84854	-6.55195
	8.7	14271.9	-7.07013	-6.80967
	8.8	14277.6	-7.08581	-6.90794
	8.9	14283.2	-6.95917	-7.05913
	9	14288.8	-6.86648	-6.95705
	9.1	14294.3	-6.81493	-6.82608
	9.2	14299.9	-6.74729	-6.7021
	9.3	14305.5	-6.71437	-6.42711
	9.4	14311.1	-6.71571	-6.29405
	9.5	14316.7	-6.6588	-6.1343
	9.6	14322.4	-6.757	-6.04275
	9.7	14328.2	-6.79464	-6.14792
	9.8	14334	-6.7943	-5.97118
	9.9	14339.9	-6.93556	-5.88748
	10	14345.9	-7.02284	-6.02433
	10.1	14352.1	-6.97144	-6.13763
	10.2	14358.3	-6.90253	-5.70881
	10.3	14364.7	-6.99696	-5.82182
	10.4	14371.2	-7.04337	-5.88627
	10.5	14377.9	-7.078	-5.67568
	10.6	14384.7	-7.0639	-5.81076
	10.7	14391.8	-7.05562	-5.80581
	10.8	14398.9	-7.04821	-5.77504
	10.9	14406.3	-7.07501	-5.79485
	11	14413.9	-6.9962	-5.6262
	11.1	14421.7	-7.16152	-5.61196
	11.2	14429.6	-7.13729	-5.64081
	11.3	14437.9	-7.29093	-5.93938
	11.4	14446.3	-7.37839	-6.00871
	11.5	14455	-7.45343	-6.50603
	11.6	14463.9	-7.45337	-6.72548
	11.7	14473.1	-7.58953	-6.76095
	11.8	14482.5	-7.52832	-6.97655
	11.9	14492.2	-7.45804	-6.99258
	12	14502.1	-7.37179	-6.79416
	12.1	14512.4	-7.20415	-6.36245
	12.2	14522.9	-7.22181	-6.41912
	12.3	14533.7	-7.27888	-5.98309
	12.4	14544.8	-7.16214	-5.62487
	12.5	14556.2	-7.06815	-5.49896
	12.6	14567.9	-6.99048	-5.54578
	12.7	14580	-7.1323	-5.69444
	12.8	14592.3	-7.10513	-5.85139
	12.9	14604.9	-7.11603	-6.11152
	13	14617.9	-7.16152	-6.31964
	13.1	14631.2	-7.03504	-6.47412
	13.2	14644.9	-6.86068	-6.47448
	13.3	14658.8	-6.93795	-7.12372
	13.4	14673.1	-6.94293	-7.31932
	13.5	14687.8	-7.09531	-7.74797
	13.6	14702.7	-6.99819	-7.83853
	13.7	14718.1	-7.07721	-8.3428
	13.8	14733.7	-6.90127	-8.91809
	13.9	14749.8	-6.88714	-9.27161
	14	14766.2	-6.7376	-9.50526
	14.1	14782.9	-6.48494	-9.67707
	14.2	14800	-6.85329	-9.49013
	14.3	14817.4	-7.59568	-11.272
	14.4	14835.3	-6.93691	-9.39265
	14.5	14853.4	-6.25623	-9.59376
	14.6	14872	-6.92887	-8.78994
	14.7	14890.9	-6.90642	-8.61125
	14.8	14910.1	-6.78396	-8.6393
	14.9	14929.8	-6.8172	-8.65611
	15	14949.8	-6.74125	-8.43484
	15.1	14970.1	-6.79852	-8.677
	15.2	14990.9	-6.5961	-8.53939
	15.3	15012	-6.76921	-8.88658
	15.4	15033.4	-6.59465	-8.58209
	15.5	15055.2	-6.61931	-8.50956
	15.6	15077.4	-6.53379	-8.13439
	15.7	15100	-6.52971	-7.85041
	15.8	15122.9	-6.49565	-7.42251
	15.9	15146.2	-6.61757	-7.31701
	16	15169.9	-6.65116	-7.35467
	16.1	15193.9	-6.24468	-7.80458
	16.2	15218.2	-6.45622	-7.74332
	16.3	15243	-6.43149	-7.69372
	16.4	15268.1	-6.40538	-7.40482
	16.5	15293.5	-6.39098	-7.36215
	16.6	15319.3	-6.66273	-8.50649
	16.7	15345.5	-6.4037	-7.39192
	16.8	15372	-6.52615	-7.6131
	16.9	15398.8	-6.40616	-7.41276
	17	15426	-6.4639	-7.39279
	17.1	15453.5	-7.38391	-9.1425
	17.2	15481.4	-6.5349	-7.20001
	17.4	15538.2	-6.70941	-7.44392
	17.5	15567.1	-6.69107	-7.23742
	17.6	15596.3	-6.72239	-6.93748
	17.7	15625.9	-6.81017	-7.24611
	17.8	15655.7	-6.89599	-7.70568
	17.9	15685.9	-6.815	-7.60159
	18	15716.4	-6.87531	-7.44358
	18.1	15747.3	-6.9765	-7.20208
	18.2	15778.4	-6.86737	-6.86867
	18.3	15809.9	-7.06073	-7.39753
	18.4	15841.6	-6.99413	-7.3361
	18.5	15873.7	-6.96299	-7.42556
	18.6	15906.1	-7.02147	-6.93588
	18.7	15938.7	-7.27099	-7.05552
	18.8	15971.7	-7.46856	-7.24278
	18.9	16004.9	-7.30422	-6.94821
	19	16038.4	-7.15769	-6.78268
	19.1	16072.2	-7.23622	-6.95927
	19.2	16106.3	-7.58717	-8.01209
	19.3	16140.7	-7.07381	-6.88811
	19.4	16175.3	-6.96118	-6.78209
	19.5	16210.2	-7.19315	-7.574
	19.6	16245.3	-6.96237	-7.33815
	19.7	16280.7	-6.72692	-7.20855
	19.8	16316.4	-6.64355	-7.23652
	19.9	16352.3	-6.44363	-6.65208
	20	16388.5	-6.32613	-6.56493
	20.1	16424.9	-6.0025	-7.38281
	20.2	16461.5	-5.98893	-7.56455
	20.3	16498.4	-5.95776	-7.92208
	20.4	16535.5	-5.83735	-7.88956
	20.5	16572.8	-5.80363	-8.16666
	20.6	16610.4	-5.58892	-8.2664
	20.7	16648.1	-5.64091	-8.81937
	20.8	16686.1	-5.46672	-9.00144
	20.9	16724.3	-5.43163	-9.25671
	21	16762.7	-5.34239	-9.14667
	21.1	16801.3	-5.48226	-9.29036
	21.2	16840.1	-5.28672	-8.82605
	21.3	16879.1	-5.36344	-8.68291
	21.4	16918.3	-5.39143	-8.9162
	21.5	16957.7	-5.25551	-8.87378
	21.6	16997.2	-5.04039	-9.07877
	21.7	17036.9	-5.03983	-9.21961
	21.8	17076.9	-5.00232	-9.39044
	21.9	17116.9	-4.77446	-9.68422
	22	17157.2	-4.74194	-9.09314
	22.1	17197.6	-4.73772	-8.71988
	22.2	17238.2	-4.57222	-8.18016
	22.3	17278.9	-4.49135	-7.85471
	22.4	17319.8	-4.49648	-7.79712
	22.5	17360.9	-4.50073	-7.5787
	22.6	17402.1	-4.38115	-7.3665
	22.7	17443.4	-4.38721	-7.53029
	22.8	17484.9	-4.45673	-8.06524
	22.9	17526.5	-4.52771	-9.11641
	23	17568.3	-4.6795	-9.65516
	23.1	17610.2	-4.73923	-9.66993
	23.2	17652.2	-4.76043	-9.45049
	23.3	17694.4	-4.81707	-8.90337
	23.4	17736.7	-4.78143	-8.3356
	23.5	17779.1	-4.80714	-8.26307
	23.6	17821.7	-4.79057	-8.75055
	23.7	17864.3	-4.81668	-9.69162
	23.8	17907.1	-4.83327	-9.35901
	23.9	17950	-4.86214	-9.0383
	24	17993.1	-4.90555	-8.56963
	24.1	18036.2	-5.0313	-8.60015
	24.2	18079.5	-5.10742	-8.00832
	24.3	18122.9	-5.11035	-8.38853
	24.4	18166.3	-5.09497	-8.46798
	24.5	18210	-5.06698	-8.1722
	24.6	18253.7	-5.01954	-7.79605
	24.7	18297.5	-5.04243	-7.18447
	24.8	18341.4	-5.05742	-7.05439
	24.9	18385.5	-4.98951	-6.93838
	25	18429.6	-4.91816	-7.01695
	25.1	18473.9	-4.93948	-7.54008
	25.2	18518.3	-4.9341	-8.22708
	25.3	18562.8	-5.0006	-8.01147
	25.4	18607.4	-5.01857	-7.08804
	25.5	18652.2	-4.99192	-7.36514
	25.6	18697	-4.98618	-6.56988
	25.7	18742	-5.0256	-6.5291
	25.8	18787.1	-5.04835	-6.8547
	25.9	18832.3	-4.94336	-6.83506
	26	18877.6	-4.86215	-7.26612
	26.1	18923.1	-4.78918	-7.48569
	26.2	18968.7	-4.82064	-7.49258
	26.3	19014.4	-4.92186	-7.43677
	26.4	19060.3	-4.92521	-7.27592
	26.5	19106.3	-4.9846	-7.11397
	26.6	19152.5	-4.99752	-7.10699
	26.7	19198.8	-5.02694	-7.60931
	26.8	19245.2	-5.01769	-8.34801
	26.9	19291.8	-5.00594	-8.47611
	27	19338.6	-4.95836	-7.79313
	27.1	19385.5	-4.90944	-7.39808
	27.2	19432.6	-4.87486	-7.35843
	27.3	19479.9	-4.88114	-7.67117
	27.4	19527.4	-4.84252	-7.96811
	27.5	19575.1	-4.77829	-8.3346
	27.6	19622.9	-4.74482	-8.54217
	27.7	19671	-4.77555	-7.98016
	27.8	19719.2	-4.8819	-7.58677
	27.9	19767.7	-4.85864	-7.18273
	28	19816.4	-4.89291	-6.92055
	28.1	19865.4	-4.92248	-6.88971
	28.2	19914.6	-4.92371	-6.97807
	28.3	19964	-4.9722	-7.32348
	28.4	20013.7	-5.08076	-7.15748
	28.5	20063.7	-5.08726	-7.17134
	28.6	20114	-5.01392	-7.21518
	28.7	20164.5	-5.26674	-7.11339
	28.8	20215.3	-5.11756	-7.18121
	28.9	20266.5	-5.13027	-7.74016
	29	20318	-5.1398	-7.80169
	29.1	20369.8	-5.38539	-8.2857
	29.2	20422	-5.2447	-8.13508
	29.3	20474.5	-5.27656	-9.03155
	29.4	20527.4	-5.24548	-9.65983
	29.5	20580.7	-5.25306	-9.81595
	29.6	20634.3	-4.94187	-8.93096
	29.7	20688.4	-4.91301	-8.35021
	29.8	20743	-4.9981	-7.77418
	29.9	20797.9	-5.15962	-8.02703
	30	20853.4	-5.16244	-8.41026
	30.1	20909.3	-5.12355	-8.62182
	30.2	20965.6	-4.9008	-8.74042
	30.3	21022.5	-4.81336	-8.51522
	30.4	21080	-4.6966	-8.18882
	30.5	21137.9	-4.60678	-7.87824
	30.6	21196.5	-4.65482	-7.61504
	30.7	21255.6	-4.79693	-7.81729
	30.8	21315.3	-4.82176	-8.14388
	30.9	21375.6	-4.90957	-8.76225
	31	21436.6	-4.89556	-9.29841
	31.1	21498.2	-4.85465	-9.16545
	31.2	21560.5	-4.80228	-9.24499
	31.3	21623.5	-4.63113	-9.12024
	31.4	21687.2	-4.63999	-9.10831
	31.5	21751.7	-4.72938	-9.36924
	31.6	21816.9	-4.62888	-9.65241
	31.7	21883	-4.56259	-10.2343
	31.8	21949.8	-4.4218	-10.0867
	31.9	22017.5	-4.71617	-10.5339
	32	22086.1	-4.54839	-9.84419
	32.1	22155.5	-4.48756	-10.0171
	32.2	22225.9	-4.41392	-9.91518
	32.3	22297.2	-4.41128	-9.80575
	32.4	22369.5	-4.39774	-9.76904
	32.5	22442.7	-4.48717	-9.19003
	32.6	22517	-4.44496	-8.53583
	32.7	22592.4	-4.47939	-8.54867
	32.8	22668.9	-4.35558	-8.74054
	32.9	22746.4	-4.40384	-8.93703
	33	22825.2	-4.37096	-9.18927
	33.1	22905.1	-4.53057	-9.81595
	33.2	22986.2	-4.49187	-9.93096
	33.3	23068.5	-4.54037	-10.2723
	33.4	23152.2	-4.9981	-9.97742
	33.5	23237.1	-4.42762	-10.7231
	33.6	23323.4	-4.40537	-10.1969
	33.7	23411.1	-4.38834	-9.4861
	33.8	23500.2	-4.45595	-9.64184
	33.9	23590.7	-4.36147	-9.12674
	34	23682.8	-4.38496	-9.15053
	34.1	23776.4	-4.40903	-9.46819
	34.2	23871.5	-4.43921	-9.20204
	34.3	23968.3	-4.63214	-9.30788
	34.4	24066.6	-4.60305	-10.0079
	34.5	24166.7	-4.21078	-9.79822
	34.6	24268.5	-4.55611	-9.29841
	34.7	24372.1	-3.85465	-9.16545
	34.8	24477.5	-3.18873	-9.06162
	34.9	24584.8	-3.33871	-9.28074
	35	24693.9	-3.1814	-9.37041
	35.1	24805	-3.06639	-9.17903
	35.2	24918.1	-3.08808	-9.10055
	35.3	25033.3	-3.0771	-9.17504
	35.4	25150.5	-3.07332	-8.88215
	35.5	25269.8	-3.24453	-9.71977
	35.6	25391.4	-3.27482	-10.227
	35.7	25515.1	-3.2719	-10.8099
	35.8	25641.2	-3.19777	-10.4109
	35.9	25769.6	-3.08136	-9.95044
	36	25900.3	-3.02938	-9.9565

## Sheet: new U-series data table
																uncorrected		corrected
			Z (mm)	238U (ppb)	2-σ abs error	232Th (ppt)	2-σ abs error	230Th/232Th	2-σ abs error	230Th/238U	2-σ abs error	δ234Umeas	2-σ abs error	δ234Uinitial	2-σ abs error	age (yrs BP)	2-σ abs error	age (yrs BP)	2-σ abs error
		FS2-9_3mm	9.504	929.44	2.41868	58.046	94.5165	9017	14682.5	0.184263	0.000998204	501.601	1.6649	522.035	1.73705	14151.5	83.0435	14149.1	83.1379
		FS2-10_7mm	10.924	901.4	1.78756	58.1106	91.0404	8899.38	13942.6	0.187725	0.00171776	485.448	1.70414	505.867	1.78756	14602.7	143.191	14600.2	143.244
		FS2-12_4mm	12.574	926.94	2.42816	27.4449	86.6697	19818	62584.7	0.191997	0.00224809	498.625	1.6238	519.911	1.71485	14814.5	185.384	14813.4	185.417
		FS2-14_2mm	14.172	860.568	2.22695	21.8062	107.573	23392.1	115396	0.19395	0.000963931	509.984	1.70073	531.814	1.77766	14853.4	80.5688	14852.5	80.7078
		FS2-16_0mm	15.924	1025.76	2.67179	36.7394	89.7453	16767	40957.6	0.196502	0.000874178	510.27	1.70933	532.419	1.78696	15058.3	73.6506	15056.9	73.7254
		FS2-19_7mm	20.2	1039.14	2.54107	26.6544	51.5666	25314	48973.5	0.212462	0.000953066	531.36	2.18818	556.092	2.29358	16122.4	81.2633	16121.4	81.2837
		FS2-24_2mm	24.5	1009.94	2.54251	512.86	49.2541	1384.36	133.019	0.230027	0.000915583	513.715	1.10125	540.118	1.16395	17778.9	77.4951	17759.8	78.063
		FS2-27_8mm	28.2	1024.92	2.75321	686.04	59.9099	1159.59	101.415	0.253974	0.00139013	514.722	3.75707	544.222	3.97741	19773	129.472	19747.8	130.02
		FS2-31_8mm	32	1101.06	2.58178	41.0311	62.4533	22534.3	34299.4	0.274771	0.00109295	493.92	0.86777	525.374	0.934041	21878	96.4026	21876.6	96.4264
		FS2-35_3mm	35.8	1057.98	2.55454	75.9791	65.9807	13650.7	11854.5	0.320774	0.00139085	519.529	2.57413	558.225	2.7737	25459.4	132.221	25456.7	132.24
		Z = depth below stalagmite FS-2 top in mm

## Sheet: new d234U data table
		Sub-	Dist	234U/238U				calculated
		sample	(mm)	(activity)	2-σ abs error	δ234Umeas	2-σ abs error	δ234Uinitial	2-σ abs error
		FS2-0.5	0.5	0.0124935	0.04717	650.89	1.55745	673.021	1.55745
		FS2-1.5	1.5	0.01223	0.11686	616.074	3.77709	638.581	3.77709
		FS2-2.5	2.5	0.0116624	0.09024	541.073	2.78133	561.656	2.78133
		FS2-3	3	0.011597	0.0582	532.426	1.78374	552.944	1.78374
		FS2-3.5	3.5	0.0115373	0.0793	524.541	2.41792	544.952	2.41792
		FS2-4.5	4.5	0.0114363	0.075	511.193	2.26679	531.345	2.26679
		FS2-5	5	0.0115126	0.2288	521.277	6.96137	541.921	6.96137
		FS2-7	7	0.0113149	0.07578	495.148	2.26605	515.05	2.26605
		FS2-9.5	9.5	0.0112741	0.11754	489.758	3.50212	509.921	3.50212
		FS2-11	11	0.0112588	0.05965	487.741	1.77488	508.188	1.77488
		FS2-12.5	12.5	0.0114042	0.0716	506.956	2.15796	528.615	2.15796
		FS2-14	14	0.0113477	0.04634	499.485	1.38972	521.22	1.38972
		FS2-15.5	15.5	0.0114479	0.07785	512.731	2.35532	535.433	2.35532
		FS2-17	17	0.0115515	0.076822	526.423	2.34526	550.135	2.34526
		FS2-18	18	0.0115963	0.05591	532.343	1.71347	556.62	1.71347
		FS2-19	19	0.0115987	0.06121	532.658	1.87628	557.291	1.87628
		FS2-20.5	20.5	0.0118698	0.058	568.483	1.81944	595.462	1.81944
		FS2-21.5	21.5	0.0118112	0.04405	560.736	1.37501	587.92	1.37501
		FS2-23	23	0.0116731	0.05334	542.482	1.64552	569.812	1.64552
		FS2-23.5	23.5	0.0115747	0.055584	529.49	1.7003	556.551	1.7003
		FS2-24	24	0.0114804	0.079816	517.022	2.42165	543.843	2.42165
		FS2-25	25	0.0113762	0.0648	503.249	1.94821	530.167	1.94821
		FS2-26.5	26.5	0.0114317	0.05543	510.595	1.67465	539.108	1.67465
		δ234U values along a growth layer transect 6.5 mm from the stalagmite top
		FS2-7.0 L2	6.5	0.0113772	0.07813	503.384	2.34919	523.542	2.34919
		FS2-7.0 L1	6.5	0.0114092	0.081	507.609	2.44233	527.937	2.44233
		FS2-7.0 C	6.5	0.0113592	0.0652	501.012	1.95732	521.075	1.95732
		FS2-7.0R1	6.5	0.0113449	0.0791	499.125	2.37162	519.112	2.37162
		FS2-7.0 R2	6.5	0.0113854	0.0843	504.468	2.53653	524.669	2.53653

## Sheet: Carlsbad Cavern shelfstone data
		Uranium-series data for shelfstone sample collected from pool basins in the Big Room of Carlsbad Cavern
															uncorrected		corrected
		sub-sample	238U (ppb)	2-σ abs error	232Th (ppt)	2-σ abs error	230Th/232Th	2-σ abs error	230Th/238U	2-σ abs error	δ234Umeas	2-σ abs error	δ234Uinitial	2-σ abs error	age (yrs BP)	2-σ abs error	age (yrs BP)	2-σ abs error
		1-BR-1-1	267.845	1.35003	1180.36	53.0167	1495.59	72.2754	0.399181	0.00739654	1230.34	12.3022	1304.76	13.1665	21153.7	444.888	20778.9	480.96
		1-BR-1-2	327.796	1.64565	9334.17	33.5745	37.3731	0.256399	0.348223	0.00268225	1219.64	9.40581	1282.33	9.97136	18352.6	173.835	17735.4	352.075
		2-BR-4-1	713.704	6.23764	2115.61	26.6032	964.77	23.892	0.173208	0.00399332	325.087	9.28977	339.086	9.69805	15211.5	392.522	14917.3	416.876
		2-BR-4-1(2)	717.58	7.61224	2131.87	34.3274	981.367	53.43	0.176583	0.00937296	321.043	10.1451	335.216	10.6278	15579.8	896.866	15285.7	905.815
															weighted-average =		14982	380
		2-BR-4-tip	614.199	3.26949	1129.9	45.1544	1511.27	64.5754	0.168383	0.00269976	344.04	6.39462	358.192	6.66422	14535.4	259.276	14262.1	292.051
		2-BR-4-tip icp	612.193	1.34868	1179.41	44.9489	1439.57	55.0952	0.167972	0.000695403	361.044	14.2494	375.645	14.8275	14302.3	175.002	14027.7	220.064
															weighted-average =		14113	180
		2-BR-4-mid	703.078	3.3045	1197.33	46.7722	1685.38	74.2971	0.173835	0.00364416	336.551	4.71461	351.01	4.93041	15128.3	343.673	14883.6	363.929
		2-BR-4-int	728.731	4.11613	2248.22	33.5157	942.035	19.4013	0.176021	0.00269158	324.888	5.90849	339.134	6.17432	15477.9	264.087	15184	300.88
		2-BR-4-int icp	726.062	2.55895	2444.94	33.6124	880.754	13.3487	0.179629	0.00130928	322.728	1.7443	337.22	1.83224	15845.4	125.728	15541.6	196.643
		2-BR-4-int icp2	728.563	1.7214	2569.8	32.7742	840.883	11.1025	0.179637	0.000746267	322.46	1.0056	336.939	1.0631	15849.7	71.6914	15541.7	169.557
															weighted-average =		15487	120
		2-BR-4-bot	615.804	3.53496	366.663	66.174	4809.19	875.373	0.17343	0.00422279	343.632	9.36134	358.328	9.77086	15004.6	406.392	14817.4	417.213
		2-BR-4-bot icp	615.141	2.79431	402.666	66.1344	4358.12	716.191	0.172781	0.00123845	331.91	3.27699	346.179	3.4214	15087.3	122.225	14892.2	158.948
		2-BR-4-bot icp2	615.503	1.48684	533.313	66.1263	3244.32	402.737	0.170256	0.0010995	332.261	1.22075	346.291	1.28084	14848.1	103.255	14634	150.813
															weighted-average =		14760	110
		3-BR-7	277.081	2.11189	3590.75	54.0211	417.094	7.58226	0.327369	0.00416952	1011.37	13.3647	1065.75	14.1384	19117.4	297.457	18531	413.781
		3-BR-8-bot	296.671	0.816642	1444.95	54.4043	260.595	9.86828	0.415306	0.00203266	1088.59	2.68431	1162.91	2.96857	23750.9	132.009	23365.1	233.532
		3-BR-9-mid	355.376	1.01185	4235.91	50.5913	84.4361	1.06392	0.329316	0.00162091	1011.96	2.61424	1067.04	2.86832	19233.8	105.686	18751.1	262.846
		3-BR-10-top	475.43	1.3134	46987.3	203.366	10.0805	0.0634389	0.325987	0.00174042	1001.52	2.42758	1052.96	3.31652	19132.8	113.008	17724.3	710.916
		4-BR-8	310.174	0.780834	433.39	41.2706	399.106	38.1082	0.000457187	4.35519e-05	531.584	1.7307	552.118	1.82613	13754	109.531	13409.9	206.169
		4-BR-8-2	300.571	0.759065	207.297	51.223	809.81	200.207	0.000225665	5.57648e-05	519.844	1.76953	540.231	1.86383	13890.5	123.814	13610.7	198.819
		4-BR-8-3	317.997	0.771933	2059.59	54.8263	86.4983	2.36814	0.00211923	5.66479e-05	537.599	1.93479	558.035	2.06298	13200.5	298.921	13200.5	298.921
		5-BR-16-1	262.092	1.0642	1656.02	28.7315	619.544	15.2087	0.237089	0.0042285	867.049	5.73313	902.45	6.0464	14679.3	281.933	14159.4	382.202
		5-BR-16-1(2)	261.868	1.40005	1707.86	29.8704	598.42	14.7501	0.236375	0.00429541	886.013	11.611	921.656	12.121	14475	294.853	13954.5	391.115
															weighted-average =		14059	270
		6-BR-17-1	499.049	1.73317	7775.36	35.0144	215.002	3.0622	0.202884	0.00283047	421.014	3.73889	440.606	3.94352	16697.4	254.696	16093	393.758
		6-BR-17-1(2)2	499.598	2.47957	7759.88	40.7568	216.923	2.74361	0.204064	0.00255702	425.977	7.00352	445.854	7.34629	16737.9	242.562	16136.8	383.96
															weighted-average =		16115	270
		6-BR-17-3	454.343	1.2264	465.377	42.7464	650.869	59.8701	0.218143	0.00122406	429.928	1.85808	451.946	1.96547	17928.5	111.486	17671.5	171.349
		6-BR-17-4	460.214	1.31792	1923.85	48.3773	205.002	5.22362	0.280412	0.00140614	419.682	1.92737	448.325	2.08227	23768.4	136.795	23359.6	245.367
		7-BR-18-1	693.732	4.23718	7423.7	32.6573	299.373	2.8266	0.19403	0.00200799	349.389	6.22232	365.954	6.52488	16840.8	205.881	16389.6	303.267
		7-BR-18-1(2)	694.291	4.9976	7541.92	41.3779	294.68	5.49405	0.193873	0.00372578	348.338	7.63348	364.851	8.0074	16840.6	363.632	16386.9	425.83
															weighted-average =		16389	250
		7-BR-18-bot	521.124	1.52253	1919.33	51.7672	173.329	4.73077	0.208884	0.00106546	356.941	2.08991	375.296	2.20935	18122.3	104.51	17742.5	216.378
		7-BR-18-mid	523.628	1.41597	3478.06	47.7942	90.2676	1.29634	0.196188	0.000975436	352.413	2.19989	369.275	2.31988	17000.5	95.8141	16537.4	250.022
		7-BR-18-top	494.174	1.31337	7047.62	53.2319	39.0615	0.341925	0.182279	0.000940754	351.751	1.6086	367.086	1.71188	15720.3	89.1242	15097.8	323.028
		See Polyak et al. 2012 supplementary Table DR1 for more information
